# Supplementary material for: Impatiens glandulifera (Himalayan balsam) chloroplast genome sequence as a promising target for populations studies
Source: PeerJ journal article supplement (doi:10.7717/peerj.8739), 2020-03-24

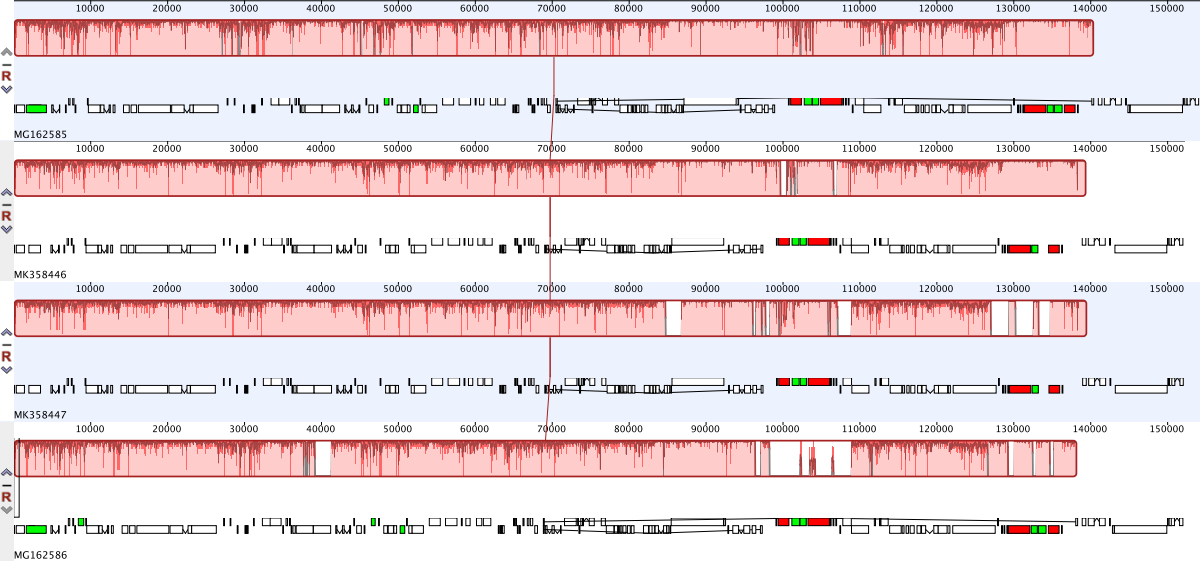

Supplement: Figure_S1.pdf [file Figure_S1.pdf]
