# Supplementary material for: Impatiens glandulifera (Himalayan balsam) chloroplast genome sequence as a promising target for populations studies
Source: PeerJ. 2020 Mar 24;8:e8739. doi: 10.7717/peerj.8739 (PMC7100601; doi:10.7717/peerj.8739)
Supplement: Supplemental Information 1 [file peerj-08-8739-s001.xlsx]

## Sheet: Sheet1
S1 Table. Intragenic variability of the two specimens of Impatiens glandulifera HB10 (Introduced UK specimen) and HB92 (native India specimen).
Gene (position)	HB10 (introduced)	HB92 (native)
matK (2600)	C	T
rpoC2 (16268) 1/2	A	G
rpoC2 (19240) 2/2	G	C
petN (28069) 1/2	C	T
petN (28077) 2/2	G	A
atpB (52572)	C	A
psbJ (63263)	C	T
clpP (69612) 1/4	-	A
clpP (70060) 2/4	-	T
clpP (70553) 3/4	T	G
clpP (71038) 4/4	G	-
psbB (72734) 1/3	G	T
psbB (72754) 2/3	G	C
psbB (72878) 3/3	C	A
petB (74424)	--A	TTT
rpl22 (83026)	T	A
ycf1 (108918)	39 gaps	TTT ATT AAT TTT AAA TTT TAA GTA ATA ATT AAA ATT ATT
ndhD (115163)	T	C
ndhA (118948)	A	T
ndhH (120340)	G	T
ycf1 (122696) 1/7	G	C
ycf1 (123091) 2/7	T	A
ycf1 (123590) 3/7	T	C
ycf1 (124320) 4/7	G	C
ycf1 (124455) 5/7	G	T
ycf1 (124995) 6/7	A	C
ycf1 (126633) 7/7	A	C
