# Supplementary material for: Impatiens glandulifera (Himalayan balsam) chloroplast genome sequence as a promising target for populations studies
Source: PeerJ. 2020 Mar 24;8:e8739. doi: 10.7717/peerj.8739 (PMC7100601; doi:10.7717/peerj.8739)
Supplement: Supplemental Information 2 [file peerj-08-8739-s002.xlsx]

## Sheet: Sheet1
S2 Table. Intergenic variability of the two specimens of Impatiens glandulifera HB10 (Introduced UK specimen) and HB92 (native India specimen).
Position (genes)	HB10 (introduced)	HB92 (native)
211 (trnH GUG-psbA)	A	-
1559 (psbA-matK)	T	-
3605 (matK-rps16) 1/4	T	G
3710 (matK-rps16) 2/4	A	-
4228 (matK-rps16) 3/4	5 gaps	ATA CA
4259 (matK-rps16) 4/4	T	G
6049 (rps16-trnQ UUG)	-	T
8270 (trnS GCU-trnR UCU) 1/3	G	T
8373 (trnS GCU-trnR UCU) 2/3	T	A
8620 (trnS GCU-trnR UCU) 3/3	T	-
20105 (rpoC2-rpoC1)	C	T
26493 (rpoB-trnC GCA) 1/2	T	C
26642 (rpoB-trnC GCA) 2/2	T	-
27535 (trnC GCA-petN)	G	A
29435 (psbM-trnD GUC) 1/5	C	A
29444 (psbM-trnD GUC) 2/5	-	T
29446 (psbM-trnD GUC) 3/5	T	A
29654 (psbM-trnD GUC) 4/5	TC	GA
29874 (psbM-trnD GUC) 5/5	G	T
30504 (trnE UUC-trnT GGU)	T	-
31778 (trnT GGU-psbD) 1/3	C	T
31825 (trnT GGU-psbD) 2/3	A	C
32005 (trnT GGU-psbD) 3/3	T	G
35429 (trnS UGA-psbZ)	C	-
35713 (psbZ-trnG GCC) 1/2	A	G
35740 (psbZ-trnG GCC) 2/2	C	-
41418 (psaA-ycf3) 1/3	G	C
41685 (psaA-ycf3) 2/3	T	C
41978 (psaA-ycf3) 3/3	-	A
46343 (trnT UGU-trnF GAA)	2 gaps	AA
47944 (trnF GAA-ndhJ) 1/2	C	A
48119 (trnF GAA-ndhJ) 2/2	G	T
50300 (ndhC-trnM CAU) 1/7	-	A
50373 (ndhC-trnM CAU) 2/7	TAT TTC TAT AA	11 gaps
50462 (ndhC-trnM CAU) 3/7	C	T
50549 (ndhC-trnM CAU) 4/7	TAT TA	5 gaps
51087 (ndhC-trnM CAU) 5/7	8 gaps	TTG TTC TC
51279 (ndhC-trnM CAU) 6/7	C	A
51347 (ndhC-trnM CAU) 7/7	T	C
55920 (rbcL-accD) 1/3	2 gaps	AA
55995 (rbcL-accD) 2/3	C	A
56136 (rbcL-accD) 3/3	T	A
60238 (ycf4-cemA)	A	-
62280 (petA-psbJ) 1/5	A	C
62324 (petA-psbJ) 2/5	C	A
62734 (petA-psbJ) 3/5	C	A
62740 (petA-psbJ) 4/5	T	A
62775 (petA-psbJ) 5/5	C	T
64275 (psbE-petL) 1/3	A	C
64416 (psbE-petL) 2/3	-	T
64820 (psbE-petL) 3/3	A	T
66053 (trnP UGG-psaJ) 1/2	22 gaps	TTT TAT TTT TCT ATT TCT TCT T
66350 (trnP UGG-psaJ) 2/2	T	C
67245 (rpl33-rps18)	-	A
68584 (rpl20-rps12)	C	T
71646 (clpP-psbB)	-	T
81065 (rpl16-rps3) 1/3	T	-
81788 (rpl16-rps3) 2/3	T	-
81985 (rpl16-rps3) 3/3	C	A
96086 (ndhB-rps7)	TATA	4 gaps
106738 (rrn5-trnR ACG)	T	G
112210 (rpl32-trnL UAG) 1/3	A	T
112395 (rpl32-trnL UAG) 2/3	GA	AG
112399 (rpl32-trnL UAG) 3/3	G--	AGT
115565 (ndhD-psaC)	AAA TC	5 gaps
116044 (psaC-ndhE)	A	C
117499 (ndhG-ndhI) 1/2	G	T
117502 (ndhG-ndhI) 2/2	A	C
128839 (trnR ACG-rrn5)	A	C
139477 (rps7-ndhB)	ATA T	4 gaps
